# Supplementary material
Source: PubMed Central journal article supplement (PMC7050567)
Supplement: NIHMS1065921-supplement-Supplemental_Material.pdf [file NIHMS1065921-supplement-Supplemental_Material.pdf]

## SUPPLEMENTARY MATERIALS

### Supp. Table 1

*List of All Cognitive Constructs and Their Corresponding Tasks Used as Outcome Measures in All Studies.*

Note: A Representative Publication That Reported Using The Task As A Cognitive Outcome Measure Is Listed Next To The Task

| Cognitive Construct              | Tasks                                                                                                                                                                                                                                                                                                                                                                                                                                                                                                                                                                                                                                                                                                                                                                                                                                                                                                                                                                                                                                                                                                                                                    | Representative Study                                                                                                                                                                                                                                                                                                                                                                                                                                                                                                                                                                                     |
|----------------------------------|----------------------------------------------------------------------------------------------------------------------------------------------------------------------------------------------------------------------------------------------------------------------------------------------------------------------------------------------------------------------------------------------------------------------------------------------------------------------------------------------------------------------------------------------------------------------------------------------------------------------------------------------------------------------------------------------------------------------------------------------------------------------------------------------------------------------------------------------------------------------------------------------------------------------------------------------------------------------------------------------------------------------------------------------------------------------------------------------------------------------------------------------------------|----------------------------------------------------------------------------------------------------------------------------------------------------------------------------------------------------------------------------------------------------------------------------------------------------------------------------------------------------------------------------------------------------------------------------------------------------------------------------------------------------------------------------------------------------------------------------------------------------------|
| Executive Control/Working Memory | <ul style="list-style-type: none"> <li>• 2-back accuracy</li> <li>• Alpha span</li> <li>• Auditory working memory</li> <li>• Alternating runs</li> <li>• Avoiding distractions</li> <li>• Block span</li> <li>• Card Prediction</li> <li>• Computation Span</li> <li>• CANTAB dimensional set shifting errors</li> <li>• Conflicting instructions</li> <li>• Cross-modality dual task divided</li> <li>• Digit span backward</li> <li>• Dot matrix</li> <li>• Dual Task</li> <li>• Executive functions domain</li> <li>• Executive functions</li> <li>• Everyday cognitive battery Memory</li> <li>• Frontal assessment battery</li> <li>• Flanker incongruent accuracy</li> <li>• Flanker incongruent RT</li> <li>• Global local-task switching</li> <li>• Hayling test (sentence completion) RT B-A</li> <li>• Inhibition</li> <li>• Letter number</li> <li>• Listening span test</li> <li>• Matrix task</li> <li>• Memory load cost</li> <li>• Mental counters</li> <li>• Number memory</li> <li>• Numerical updating easy</li> <li>• Numerical updating difficult</li> <li>• Operation span</li> <li>• Plus-minus</li> <li>• Reading span</li> </ul> | <ul style="list-style-type: none"> <li>• Basak 2008</li> <li>• Craik 2007</li> <li>• Shatil 2013</li> <li>• Sandberg 2013</li> <li>• Shatil 2013</li> <li>• Buschkuehl 2008</li> <li>• Bozoki 2013</li> <li>• Sandberg 2013</li> <li>• Finn 2011</li> <li>• Uchida 2008</li> <li>• Gagnon 2012</li> <li>• Carretti 2013</li> <li>• Carretti 2013</li> <li>• Anguera 2013</li> <li>• Lampit 2014</li> <li>• Peretz 2011</li> <li>• Whitlock 2012</li> <li>• Miller 2013</li> <li>• Boot 2013</li> <li>• Boot 2013</li> <li>• van Muijden 2012</li> <li>• Zimmerman 2014</li> <li>• Shatil 2013</li> </ul> |

|                       |                                                                                                                                                                                                                                                                                                                                                                                                                                                                                                                                                                                                                                                                                                                                                                                                                                                         |                                                                                                                                                                                                                                                                                                                                                                                                                                                                                                                                                                                                                                                                                                                                                                                                                                                                                                 |
|-----------------------|---------------------------------------------------------------------------------------------------------------------------------------------------------------------------------------------------------------------------------------------------------------------------------------------------------------------------------------------------------------------------------------------------------------------------------------------------------------------------------------------------------------------------------------------------------------------------------------------------------------------------------------------------------------------------------------------------------------------------------------------------------------------------------------------------------------------------------------------------------|-------------------------------------------------------------------------------------------------------------------------------------------------------------------------------------------------------------------------------------------------------------------------------------------------------------------------------------------------------------------------------------------------------------------------------------------------------------------------------------------------------------------------------------------------------------------------------------------------------------------------------------------------------------------------------------------------------------------------------------------------------------------------------------------------------------------------------------------------------------------------------------------------|
|                       | <ul style="list-style-type: none"> <li>• Span board backward</li> <li>• Spatial working memory</li> <li>• Self-ordered pointing task</li> <li>• Shifting</li> <li>• Smiling faces</li> <li>• Stop RT</li> <li>• Stroop</li> <li>• Trail making B</li> <li>• Trails B-Trails A</li> <li>• TS accuracy</li> <li>• TS Switch accuracy</li> <li>• TS Switch RT</li> <li>• Verbal 2-back</li> <li>• Verbal complex span</li> <li>• Verbal task switching</li> <li>• Working memory ascendant order of digits</li> <li>• Working memory auditory word span in sentences</li> <li>• Working memory, attend to distraction</li> <li>• Working memory, ignore distraction</li> <li>• Working memory, no distraction</li> <li>• Working memory span intrusions</li> <li>• Working memory span recall</li> <li>• Wisconsin card sort category completed</li> </ul> | <ul style="list-style-type: none"> <li>• Stern 2011</li> <li>• Moro 2015</li> <li>• Borella 2014</li> <li>• Basak 2008</li> <li>• van Muijden 2012</li> <li>• Sandberg 2013</li> <li>• Xin 2014</li> <li>• Xin 2014</li> <li>• Basak 2008</li> <li>• Sandberg 2013</li> <li>• Buerki 2014</li> <li>• Brehmer 2012</li> <li>• Simpson 2012</li> <li>• Legault 2011</li> <li>• Shatil 2013</li> <li>• van Muijden 2012</li> <li>• Basak 2008</li> <li>• Dustman 1992</li> <li>• Shatil 2014</li> <li>• Legault 2011</li> <li>• Basak 2008</li> <li>• Basak 2008</li> <li>• Basak 2008</li> <li>• Buerki 2014</li> <li>• von Bastian 2013</li> <li>• von Bastian 2013</li> <li>• Zimmerman 2014</li> <br/> <li>• Zimmerman 2014</li> <br/> <li>• Anguera 2013</li> <li>• Anguera 2013</li> <li>• Anguera 2013</li> <li>• Borella 2014</li> <li>• Borella 2014</li> <li>• Zimmerman 2014</li> </ul> |
| Attentional Processes | <ul style="list-style-type: none"> <li>• 1 back accuracy</li> <li>• 1 back RT</li> <li>• Addenbrooke attention and orientation</li> <li>• Attention blink</li> <li>• Attentional matrices</li> <li>• Bell's test</li> </ul>                                                                                                                                                                                                                                                                                                                                                                                                                                                                                                                                                                                                                             | <ul style="list-style-type: none"> <li>• Sandberg 2013</li> <li>• Sandberg 2013</li> <li>• Ordonez 2011</li> <li>• Salminen 2016</li> <li>• Moro 2012</li> <li>• Moro 2012</li> </ul>                                                                                                                                                                                                                                                                                                                                                                                                                                                                                                                                                                                                                                                                                                           |

|                                                                                                                                                                                                                                                                                                                                                                                                                                                                                                                                                                                                                                                                                                                                                                                                                                                                                                                                                                                                                                                                                                                                                                                                                                                                                                                                                                                                                                                                     |                                                                                                                                                                                                                                                                                                                                                                                                                                                                                                                                                                                                                                                                                                                                                                                                                                                                                                                                                                                                                                                                |
|---------------------------------------------------------------------------------------------------------------------------------------------------------------------------------------------------------------------------------------------------------------------------------------------------------------------------------------------------------------------------------------------------------------------------------------------------------------------------------------------------------------------------------------------------------------------------------------------------------------------------------------------------------------------------------------------------------------------------------------------------------------------------------------------------------------------------------------------------------------------------------------------------------------------------------------------------------------------------------------------------------------------------------------------------------------------------------------------------------------------------------------------------------------------------------------------------------------------------------------------------------------------------------------------------------------------------------------------------------------------------------------------------------------------------------------------------------------------|----------------------------------------------------------------------------------------------------------------------------------------------------------------------------------------------------------------------------------------------------------------------------------------------------------------------------------------------------------------------------------------------------------------------------------------------------------------------------------------------------------------------------------------------------------------------------------------------------------------------------------------------------------------------------------------------------------------------------------------------------------------------------------------------------------------------------------------------------------------------------------------------------------------------------------------------------------------------------------------------------------------------------------------------------------------|
| <ul style="list-style-type: none"> <li>• Bourdon test</li> <li>• Calculation</li> <li>• Card rotation</li> <li>• Change detection task</li> <li>• Clock drawing test</li> <li>• Complex choice accuracy</li> <li>• Complex choice RT</li> <li>• Digit symbol substitution test</li> <li>• Filter task</li> <li>• Focused attention</li> <li>• Go RT</li> <li>• Go-No Go false alarm</li> <li>• Hidden pattern</li> <li>• Information processing speed</li> <li>• Hand-eye coordination</li> <li>• Letter comparison</li> <li>• Mattis dementia attention</li> <li>• Mental rotation accuracy</li> <li>• Mental rotation RT</li> <li>• Monitoring</li> <li>• Number comparison</li> <li>• Object perspective</li> <li>• Paced auditory serial addition task</li> <li>• Pattern comparison</li> <li>• Rapid visual information processing</li> <li>• RBANS attention</li> <li>• Simple choice accuracy</li> <li>• Simple choice RT</li> <li>• Selective attention</li> <li>• Sustained attention</li> <li>• Speed of visual-spatial information processing</li> <li>• Stimulation detection task</li> <li>• Symbol digit modalities test</li> <li>• Symbol search</li> <li>• Trail making A</li> <li>• Test of attention performance</li> <li>• Test of variables of attention</li> <li>• UFOV</li> <li>• Visual scanning</li> <li>• Visual search far</li> <li>• Visual search middle</li> <li>• Visual search near</li> <li>• Visual selective attention</li> </ul> | <ul style="list-style-type: none"> <li>• Moro 2012</li> <li>• Hwang 2012</li> <li>• Stine-Morrow 2008</li> <li>• Anguera 2013</li> <li>• Lima-Silva 2010</li> <li>• Boot 2013</li> <li>• Boot 2013</li> <li>• Uchida 2008</li> <li>• Anguera 2013</li> <li>• Peretz 2011</li> <li>• Basak 2008</li> <li>• Wilkinson 2011</li> <li>• Stine-Morrow 2008</li> <li>• Theill 2013</li> <li>• Shatil 2013</li> <li>• Buerki 2014</li> <li>• Kwok 2013</li> <li>• Whitlock 2012</li> <li>• Whitlock 2012</li> <li>• Bozoki 2013</li> <li>• Boot 2013</li> <li>• Whitlock 2012</li> <li>• Brehmer 2012</li> <li>• Borella 2010</li> <li>• Kim 2015</li> <li>• Lee 2013</li> <li>• Boot 2013</li> <li>• Boot 2013</li> <li>• Theill 2013</li> <li>• Bailey 2011</li> <li>• Shatil 2013</li> <br/> <li>• Anguera 2013</li> <li>• Dustman 1992</li> <li>• Nouchi 2012</li> <li>• Shatil 2014</li> <li>• van Muijden 2012</li> <li>• Anguera 2013</li> <li>• Anguera 2013</li> <li>• Shatil 2013</li> <li>• Boot 2013</li> <li>• Boot 2013</li> <li>• Boot 2013</li> </ul> |
|---------------------------------------------------------------------------------------------------------------------------------------------------------------------------------------------------------------------------------------------------------------------------------------------------------------------------------------------------------------------------------------------------------------------------------------------------------------------------------------------------------------------------------------------------------------------------------------------------------------------------------------------------------------------------------------------------------------------------------------------------------------------------------------------------------------------------------------------------------------------------------------------------------------------------------------------------------------------------------------------------------------------------------------------------------------------------------------------------------------------------------------------------------------------------------------------------------------------------------------------------------------------------------------------------------------------------------------------------------------------------------------------------------------------------------------------------------------------|----------------------------------------------------------------------------------------------------------------------------------------------------------------------------------------------------------------------------------------------------------------------------------------------------------------------------------------------------------------------------------------------------------------------------------------------------------------------------------------------------------------------------------------------------------------------------------------------------------------------------------------------------------------------------------------------------------------------------------------------------------------------------------------------------------------------------------------------------------------------------------------------------------------------------------------------------------------------------------------------------------------------------------------------------------------|

|                    |                                                                                                                                                                                                                                                                                                                                                                                                                                                                                                                                                           |                                                                                                                                                                                                                                                                                                                                                                                                                                                                                                        |
|--------------------|-----------------------------------------------------------------------------------------------------------------------------------------------------------------------------------------------------------------------------------------------------------------------------------------------------------------------------------------------------------------------------------------------------------------------------------------------------------------------------------------------------------------------------------------------------------|--------------------------------------------------------------------------------------------------------------------------------------------------------------------------------------------------------------------------------------------------------------------------------------------------------------------------------------------------------------------------------------------------------------------------------------------------------------------------------------------------------|
|                    | <ul style="list-style-type: none"> <li>• Verbal 0-back</li> </ul>                                                                                                                                                                                                                                                                                                                                                                                                                                                                                         | <ul style="list-style-type: none"> <li>• Gagnon 2012</li> <li>• Buerki 2014</li> </ul>                                                                                                                                                                                                                                                                                                                                                                                                                 |
| Short Term Memory  | <ul style="list-style-type: none"> <li>• Benton visual retention test</li> <li>• Brown Peterson primary memory performance</li> <li>• Corsi Block tapping 4</li> <li>• Corsi Block tapping 5</li> <li>• Corsi Block tapping 6</li> <li>• Corsi Block tapping 7</li> <li>• Counting span</li> <li>• Digit span forward</li> <li>• Enumeration</li> <li>• Memory span</li> <li>• Motor series</li> <li>• Short term memory</li> <li>• Visual STM</li> </ul>                                                                                                 | <ul style="list-style-type: none"> <li>• Dustman 1992</li> <li>• Craik 2007</li> <li>• Boot 2013</li> <li>• Boot 2013</li> <li>• Boot 2013</li> <li>• Boot 2013</li> <li>• van Muijden 2012</li> <li>• Mahncke 2006</li> <li>• Basak 2008</li> <li>• Theill 2013</li> <li>• Uchida 2008</li> <li>• Buiza 2008</li> <li>• Basak 2008</li> </ul>                                                                                                                                                         |
| Reasoning          | <ul style="list-style-type: none"> <li>• Cattell</li> <li>• Abstraction</li> <li>• Analogies</li> <li>• Arithmetic</li> <li>• Block design</li> <li>• Everyday cognitive battery: Reasoning</li> <li>• Everyday problem solving</li> <li>• Figure classification</li> <li>• Letter series test</li> <li>• Letter sets test</li> <li>• Map drawing</li> <li>• Planning</li> <li>• Problem solving</li> <li>• Progressive matrices</li> <li>• Raven</li> <li>• Reasoning</li> <li>• TONI-3</li> <li>• Tower of Hanoi</li> <li>• Visual reasoning</li> </ul> | <ul style="list-style-type: none"> <li>• Tranter 2007</li> <li>• Buiza 2008</li> <li>• Moro 2012</li> <li>• McDougall 2012</li> <li>• Stern 2011</li> <li>• Boot 2013</li> <li>• Stine-Morrow 2008</li> <li>• Stine-Morrow 2008</li> <li>• Margrett 2006</li> <li>• Ball 2010</li> <li>• Caretti 2013</li> <li>• Shatil 2013</li> <li>• Noice 2009</li> <li>• Whitlock 2012</li> <li>• Basak 2008</li> <li>• Theill 2013</li> <li>• Shatil 2014</li> <li>• Zinke 2014</li> <li>• Cheng 2012</li> </ul> |
| Semantic Knowledge | <ul style="list-style-type: none"> <li>• Animal fluency</li> <li>• Animal naming</li> <li>• Boston naming test</li> <li>• Category fluency</li> <li>• COWAT animals</li> <li>• Integral narrative discourse</li> </ul>                                                                                                                                                                                                                                                                                                                                    | <ul style="list-style-type: none"> <li>• Hwang 2012</li> <li>• Miller 2013</li> <li>• Miller 2013</li> <li>• Stern 2011</li> <li>• Mowszowski 2014</li> <li>• Zimmerman 2014</li> </ul>                                                                                                                                                                                                                                                                                                                |

|                      |                                                                                                                                                                                                                                                                                                                                                                                                                                                                                                                                                                                                                                               |                                                                                                                                                                                                                                                                                                                                                                                                                                                    |
|----------------------|-----------------------------------------------------------------------------------------------------------------------------------------------------------------------------------------------------------------------------------------------------------------------------------------------------------------------------------------------------------------------------------------------------------------------------------------------------------------------------------------------------------------------------------------------------------------------------------------------------------------------------------------------|----------------------------------------------------------------------------------------------------------------------------------------------------------------------------------------------------------------------------------------------------------------------------------------------------------------------------------------------------------------------------------------------------------------------------------------------------|
|                      | <ul style="list-style-type: none"> <li>• Language domain</li> <li>• Letter fluency (FAS)</li> <li>• Lexical fluency</li> <li>• Naming</li> <li>• Narrative discourse questions</li> <li>• Opposites</li> <li>• Orthographic verbal fluency</li> <li>• Phonemic fluency</li> <li>• PVF (FAS)</li> <li>• RBANS Language</li> <li>• Reading comprehension</li> <li>• Semantic verbal fluency</li> <li>• Unconstrained verbal fluency</li> <li>• Verbal fluency</li> <li>• Vocabulary</li> <li>• Word association fluency</li> </ul>                                                                                                              | <ul style="list-style-type: none"> <li>• Lampit 2014</li> <li>• Sandberg 2013</li> <li>• Uchida 2008</li> <li>• Shatil 2013</li> <li>• Zimmerman 2014</li> <li>• Stine-Morrow 2008</li> <li>• Zimmerman 2014</li> <li>• Buiza 2008</li> <li>• Murphy 2014</li> <li>• Lee 2013</li> <li>• Carretti 2013</li> <li>• Zimmerman 2014</li> <li>• Zimmerman 2014</li> <li>• Noice 2009</li> <li>• McDougall 2012</li> <li>• Stine-Morrow 2008</li> </ul> |
| Everyday functioning | <ul style="list-style-type: none"> <li>• Activities of daily living</li> <li>• Brief assessment of prospective memory</li> <li>• Cognitive failure questionnaire</li> <li>• Dysexecutive questionnaire</li> <li>• Everyday cognition battery</li> <li>• Everyday memory questionnaire</li> <li>• Everyday problem solving</li> <li>• Functional activity questionnaire</li> <li>• Hopkins prospective memory test</li> <li>• Instrumental activities of daily living</li> <li>• Memory controllability inventory</li> <li>• Object misplacement</li> <li>• The everyday attention test</li> <li>• Rivermead behavioral memory test</li> </ul> | <ul style="list-style-type: none"> <li>• Ceccato 2012</li> <li>• Lee 2013</li> <li>• Finn 2015</li> <li>• Craik 2007</li> <li>• Boot 2013</li> <li>• Diamond 2015</li> <li>• Stine-Morrow 2008</li> <li>• Hyer 2015</li> <li>• Rasmusson 1999</li> <li>• McDougall 2010</li> <li>• Rasmusson 1999</li> <li>• Fairchild 2010</li> <li>• Moro 2015</li> <li>• Rasmusson 1999</li> </ul>                                                              |

**Supp. Table 2***Publications Excluded From the Meta-Analyses and the Reasons for Exclusion*

| Excluded Publication                                             | Reasons for Exclusion                    |
|------------------------------------------------------------------|------------------------------------------|
| Nozawa et al., 2015                                              | No sufficient data                       |
| Brom & Kliegel, 2014                                             | No sufficient data                       |
| Optale et al., 2010                                              | No sufficient data                       |
| Chambon, Herrera, Romaiguere, Paban, & Alescio-Lautier, 2014     | No sufficient data                       |
| Mcdaniel et al., 2014                                            | No sufficient data                       |
| Gaitán et al., 2013                                              | No sufficient data                       |
| Stepankova, Lukavsky, Kopecek, Steinova, & Ripova, 2012          | No random assignment                     |
| Miller, Taler, Davidson, & Messier, 2012                         | No control                               |
| Peng, Wen, Wang, & Gao, 2012                                     | No sufficient data                       |
| Brehmer, Shing, Heekeren, Lindenberger, & Bäckman, 2016          | No sufficient data                       |
| Hastings & West, 2009                                            | No sufficient data                       |
| Li et al., 2008                                                  | No sufficient data                       |
| Kwok et al., 2011                                                | No sufficient data                       |
| Stavros, Fotini, & Magda, 2010                                   | No sufficient data                       |
| Stine-Morrow et al., 2014                                        | No sufficient data                       |
| Tesky, Thiel, Banzer, & Pantel, 2011                             | No sufficient data                       |
| Benjamin M Hampstead, Sathian, et al., 2012                      | No sufficient data                       |
| Kramer, Larish, & Strayer, 1995                                  | No age matched control                   |
| Vermeij, Claassen, Dautzenberg, & Kessels, 2016                  | No control                               |
| Horning, Young, Myhre, Osato, & Wilkins, 2016                    | No sufficient data                       |
| Barnes et al., 2013                                              | Combined cognitive and physical training |
| B. M. Hampstead et al., 2011                                     | No control                               |
| Lima-Silva et al., 2012                                          | No random assignment                     |
| Tamura et al., 2015                                              | No random assignment                     |
| Anand et al., 2011                                               | No control                               |
| Barcelos et al., 2015                                            | Combined cognitive and physical training |
| Engvig et al., 2014                                              | No mental status matched control         |
| Belleville et al., 2011                                          | No mental status matched control         |
| Benjamin M Hampstead, Stringer, Stilla, Giddens, & Sathian, 2012 | No mental status matched control         |
| Quayhagen & Quayhagen, 1989                                      | Alzheimer's disease patients             |
| Cipriani, Bianchetti, & Trabucchi, 2006                          | No control                               |
| Pieramico et al., 2012                                           | Combined cognitive and physical training |
| Ngandu et al., 2015                                              | Combined cognitive and physical training |
| Heinzel et al., 2014                                             | Combined cognitive and physical training |
| Hoogenhout, de Groot, van der Elst, & Jolles, 2012               | Prospective study                        |
| Rahe et al., 2015                                                | No control                               |

|                                                   |                                          |
|---------------------------------------------------|------------------------------------------|
| Foster, Rosenblatt, & Kuljiš, 2011                | Alzheimer's disease patients             |
| Legault, Allard, & Faubert, 2013                  | No age matched control                   |
| Hughes et al., 2014                               | Feasibility study                        |
| Kirchhoff, Anderson, Smith, Barch, & Jacoby, 2012 | No age matched control                   |
| Schwenk, Zieschang, Oster, & Hauer, 2010          | Alzheimer's disease patients             |
| Grandjean & Collette, 2011                        | No age matched control                   |
| Bottino et al., 2005                              | Alzheimer's disease patients             |
| Lövdén et al., 2012                               | No age matched control                   |
| Candela, Zucchetti, Magistro, & Rabaglietti, 2015 | Combined cognitive and physical training |
| Klusmann et al., 2010                             | Combined cognitive and physical training |
| León, Ureña, Bolaños, Bilbao, & Oña, 2015         | Combined cognitive and physical training |
| Linde & Alfermann, 2014                           | Combined cognitive and physical training |
| Sugano et al., 2012                               | Combined cognitive and physical training |
| Cheng et al., 2014                                | Alzheimer's disease patients             |
| Yáguiez, Shaw, Morris, & Matthews, 2011           | Alzheimer's disease patients             |
| Van Vleet et al., 2016                            | No control                               |
| Noice, Noice, & Staines, 2004                     | Combined cognitive and physical training |
| Noice & Noice, 2009                               | Combined cognitive and physical training |
| Bahar-Fuchs et al., 2017                          | Mixed MCI and depression patients        |
| Almondes, Leonardo, & Moreira, 2017               | No sufficient data                       |
| Rolle, Anguera, Skinner, Voytek, & Gazzaley, 2017 | No sufficient data                       |
| Sandberg & Stigsdotter Neely, 2016                | No age matched control                   |
| Gajewski & Falkenstein, 2018                      | No sufficient data                       |
| Gaál & Czigler, 2018                              | No sufficient data                       |
| de Lange et al., 2017                             | No sufficient data                       |
| Goghari & Lawlor-Savage, 2018                     | No sufficient data                       |
| Carlson et al., 2015                              | Combined cognitive and physical training |
| Fried et al., 2004                                | Combined cognitive and physical training |
| Ross, Freed, Edwards, Phillips, & Ball, 2016      | No cognitive outcome reported            |

---

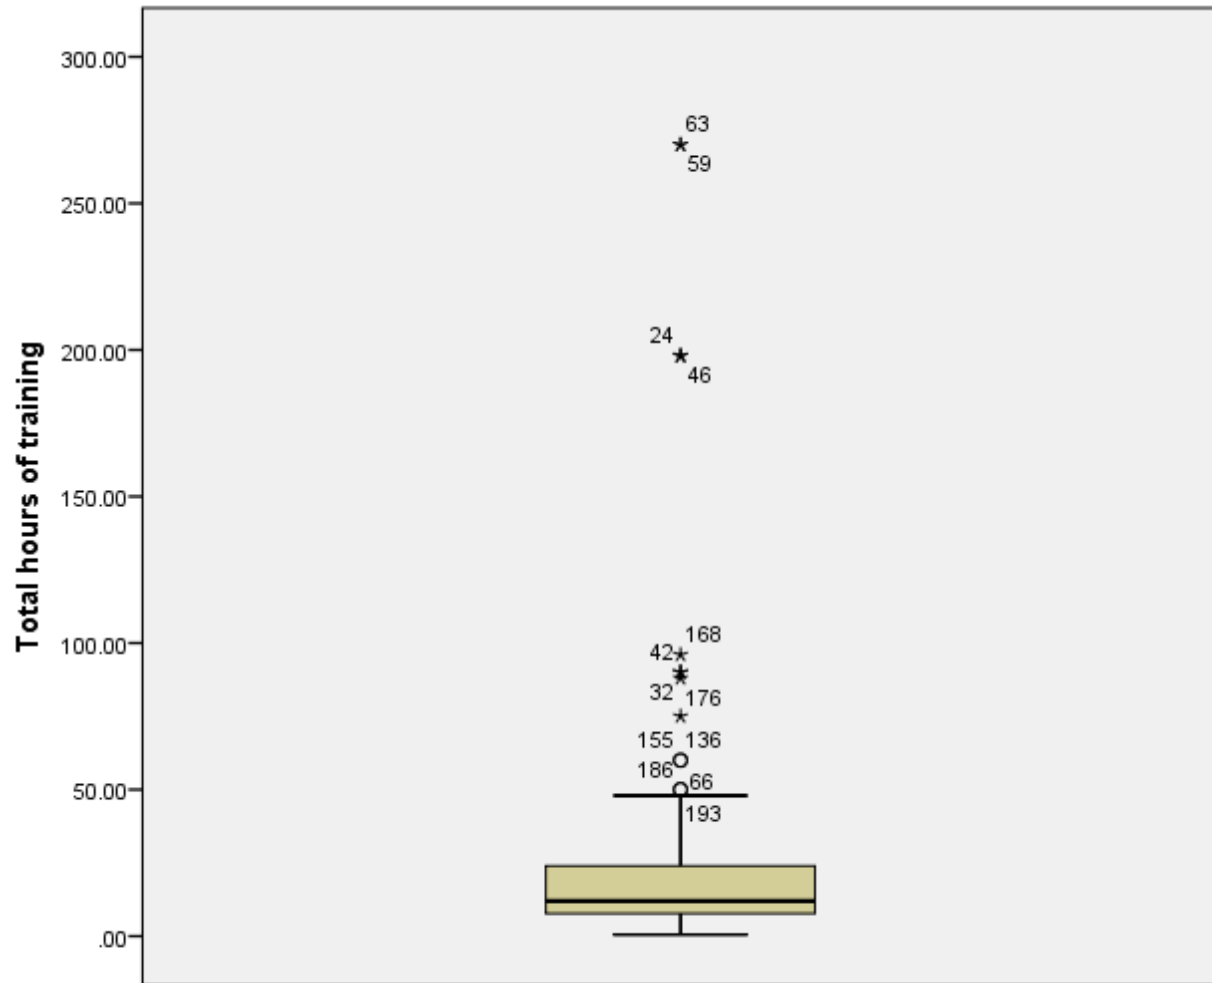

*Supp. Figure 1.* Outlier analysis on total hours of training in all studies.
